# Supplementary material for: Integrated omics of Saccharomyces cerevisiae CENPK2-1C reveals pleiotropic drug resistance and lipidomic adaptations to cannabidiol
Source: Springer Nature journal article supplement (doi:10.1038/s41540-024-00382-0), 2024-05-31
Supplement: MOESM1 [file 41540_2024_382_MOESM1_ESM.pdf]

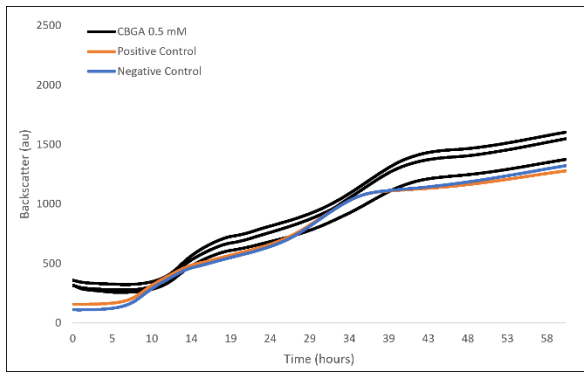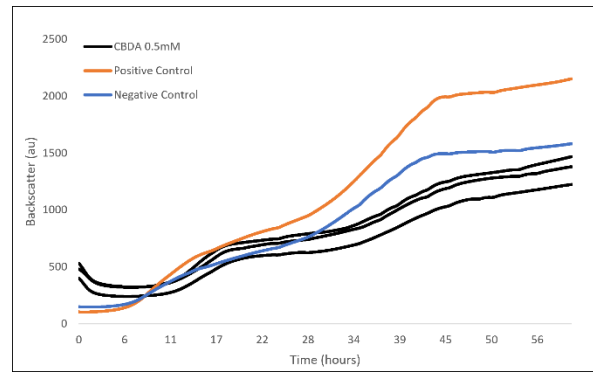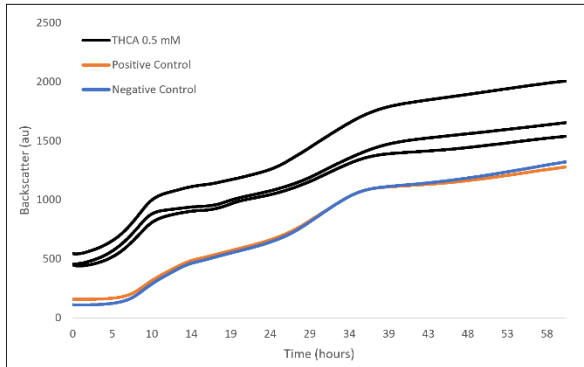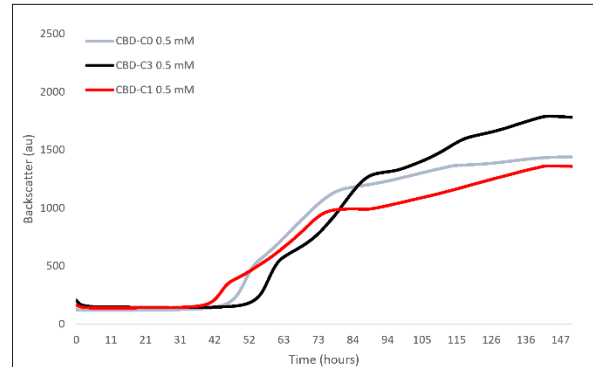

**Supplementary Figure 1:** Top left - CBGA was fed to a yeast cell culture at a concentration of 0.5 mM. at the time of inoculation, started at 0.1 ODU/mL. Bottom left- THCA was fed to a yeast cell culture at a concentration of 0.5 mM. at the time of inoculation, started at 0.1 ODU/mL. Top right- CBDA was fed to a yeast cell culture at a concentration of 0.5 mM. at the time of inoculation, started at 0.1 ODU/mL. Acidic cannabinoid each exerted a unique pattern of cell growth and adaptation. Bottom right- yeast were given cannabidiarin (CBD-C3), or cannabidiocol (CBD-C1), and cannabidiorecol.(CBD-C0). Short-alkyl chain cannabinoids suspended growth entirely until the cells overcame the influence of the cannabinoids.

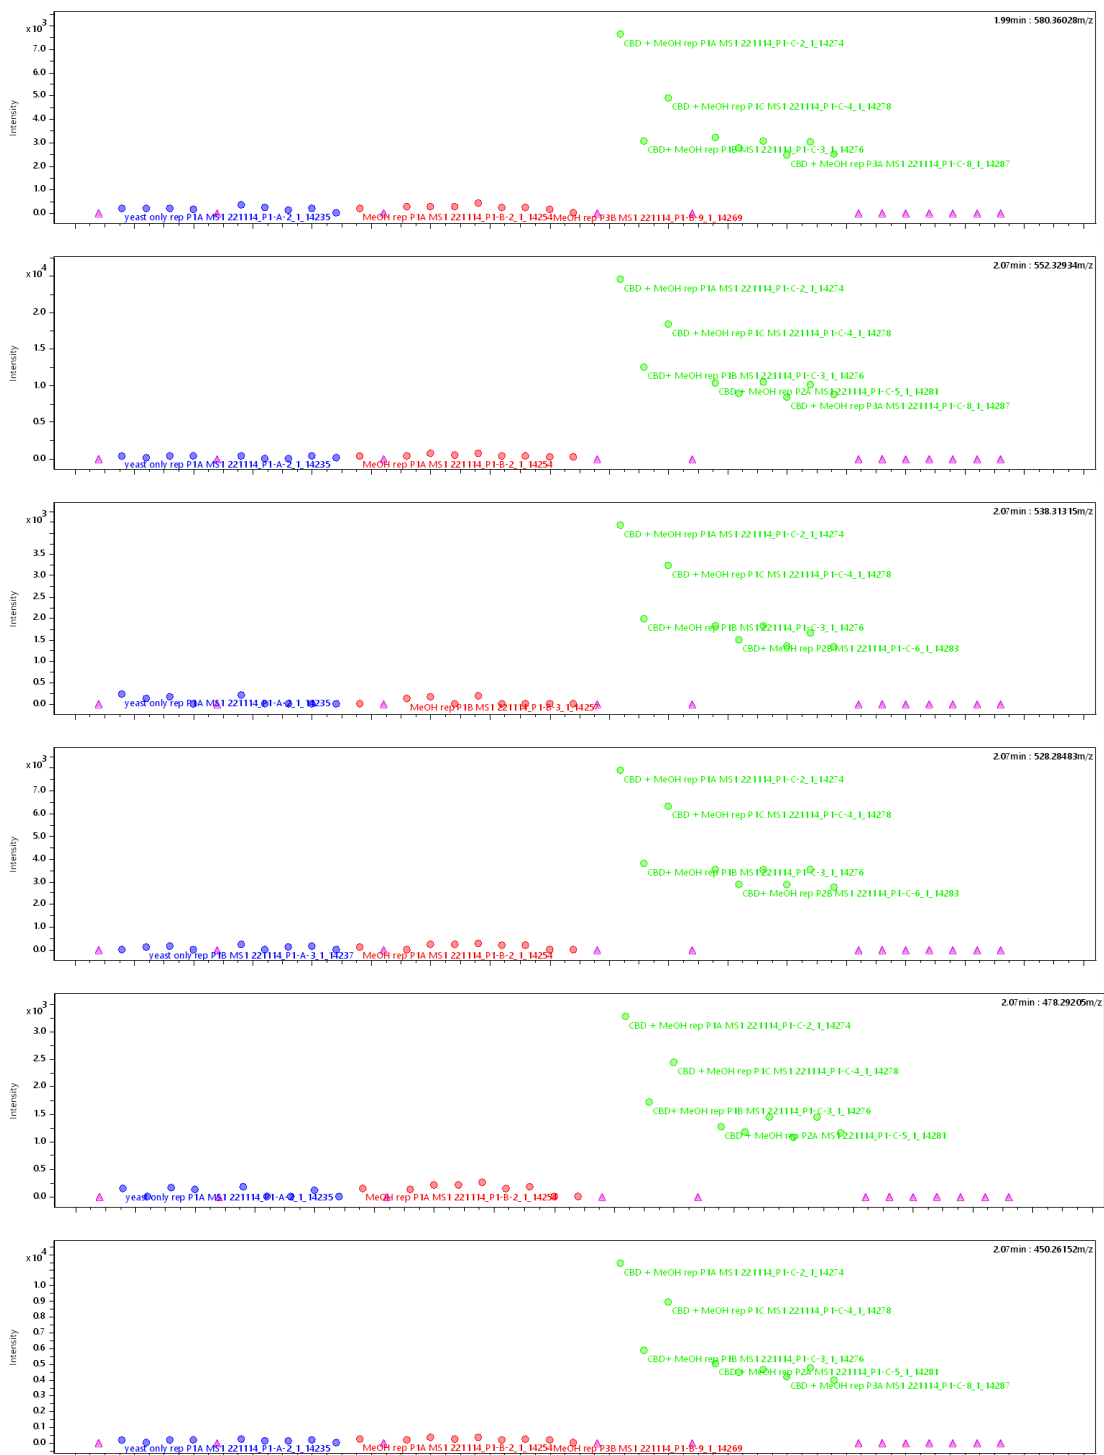

**Supplementary Figure 2:** The shared pattern of intensity across the spectra at 2.0 min at m/z 580.36028 (parent), 552.32934 (F1, confirmed in MetFrag), 538.31315 (F2, confirmed in MetFrag), 528.28483 (F3, not found in any database) and 478.29205 (F4, confirmed in MetFrag) led us to conclude that all of these spectra were related as a single compound. In spite of no collision energy, we submitted the smaller spectra as fragments in MetFrag and found database hits for 3 out of 4 spectra.

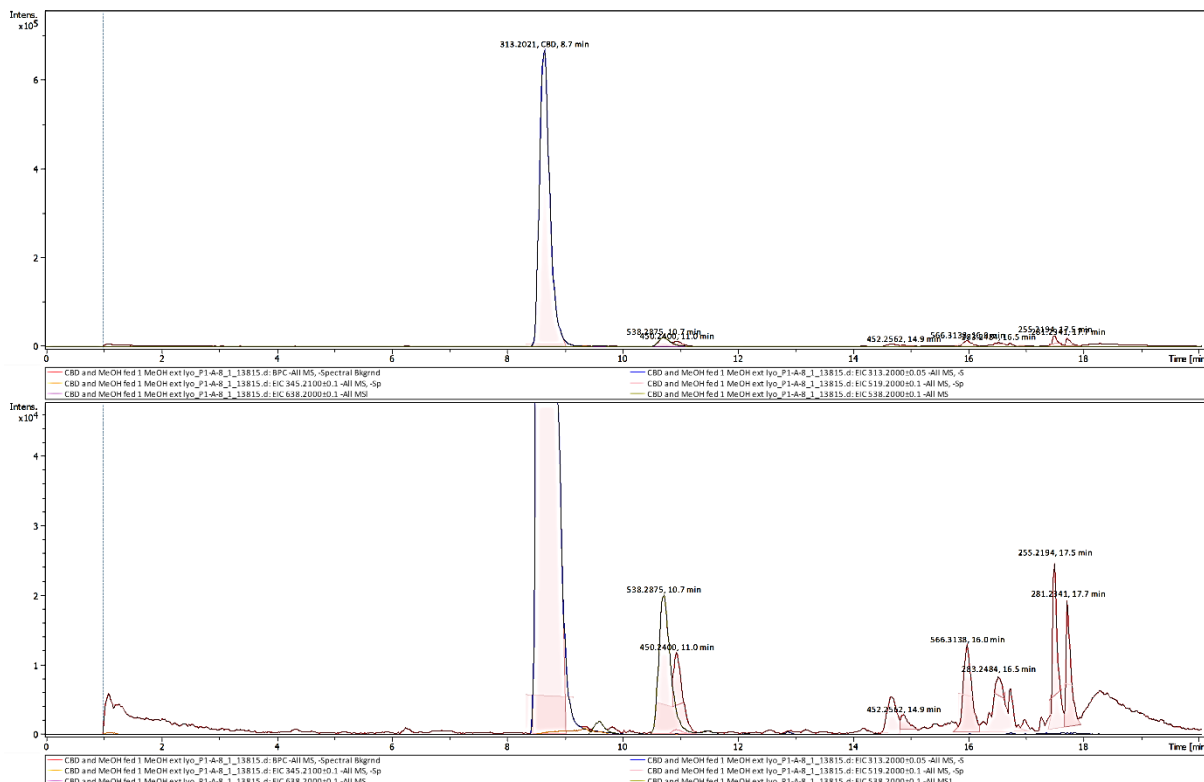

**Supplementary Figure 3:** HRMS Raw Chromatogram of CBD-fed cell pellet samples using reverse phase C18 chromatography. (Top) Overview of entire chromatogram. (Bottom) Zoomed in view to show information about smaller peaks. Labels are of the base peak in each integration followed by the retention time.

*Supplementary Table 1:* Nanoplot statistics from *S. cerevisiae* CENPK2-1C gDNA sequenced using SQK-LSK109 kit and R9.1.4 flow cell on an Oxford Nanopore MinION MK1C. Basecalling was performed in Guppy using super accurate basecalling.

|                                       |                          |
|---------------------------------------|--------------------------|
| <b>number_of_reads</b>                | 477258                   |
| <b>number_of_bases</b>                | 5043072114.0             |
| <b>median_read_length</b>             | 8554.0                   |
| <b>mean_read_length</b>               | 10566.8                  |
| <b>read_length_stdev</b>              | 8256.7                   |
| <b>n50</b>                            | 15469.0                  |
| <b>mean_qual</b>                      | 15.5                     |
| <b>median_qual</b>                    | 15.8                     |
| <b>longest_read_(with_Q):1</b>        | 101896 (16.4)            |
| <b>longest_read_(with_Q):2</b>        | 96770 (10.4)             |
| <b>longest_read_(with_Q):3</b>        | 91864 (17.8)             |
| <b>longest_read_(with_Q):4</b>        | 477258                   |
| <b>longest_read_(with_Q):5</b>        | 5043072114.0             |
| <b>highest_Q_read_(with_length):1</b> | 8554.0                   |
| <b>highest_Q_read_(with_length):2</b> | 10566.8                  |
| <b>highest_Q_read_(with_length):3</b> | 8256.7                   |
| <b>highest_Q_read_(with_length):4</b> | 23.3 (1074)              |
| <b>highest_Q_read_(with_length):5</b> | 23.1 (25994)             |
| <b>highest_Q_read_(with_length):4</b> | 23.3 (1074)              |
| <b>highest_Q_read_(with_length):5</b> | 23.1 (25994)             |
| <b>Reads &gt;Q5:</b>                  | 477258 (100.0%) 5043.1Mb |
| <b>Reads &gt;Q7:</b>                  | 477258 (100.0%) 5043.1Mb |
| <b>Reads &gt;Q10:</b>                 | 477247 (100.0%) 5043.1Mb |
| <b>Reads &gt;Q12:</b>                 | 426945 (89.5%) 4480.9Mb  |
| <b>Reads &gt;Q15:</b>                 | 290826 (60.9%) 3079.6Mb  |

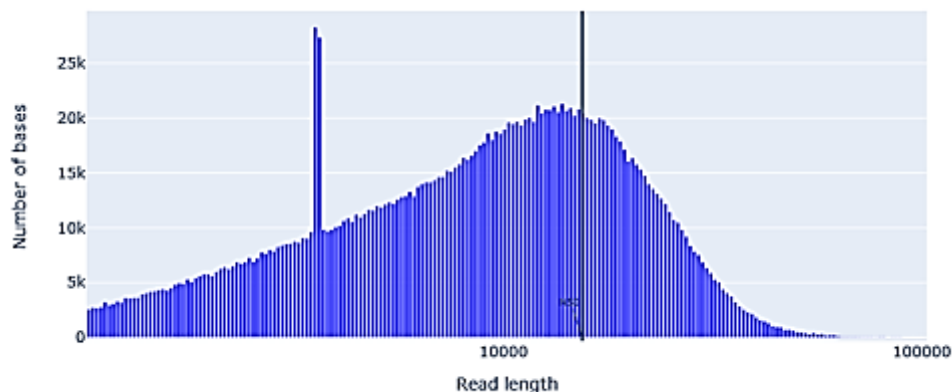

*Supplementary Figure 4:* Nanoplot weighted histogram from *S. cerevisiae* CENPK2-1C gDNA sequenced using SQK-LSK109 kit and R9.1.4 flow cell on an Oxford Nanopore MinION MK1C. Basecalling was performed in Guppy using super accurate basecalling. The N50 is shown by the black bar.

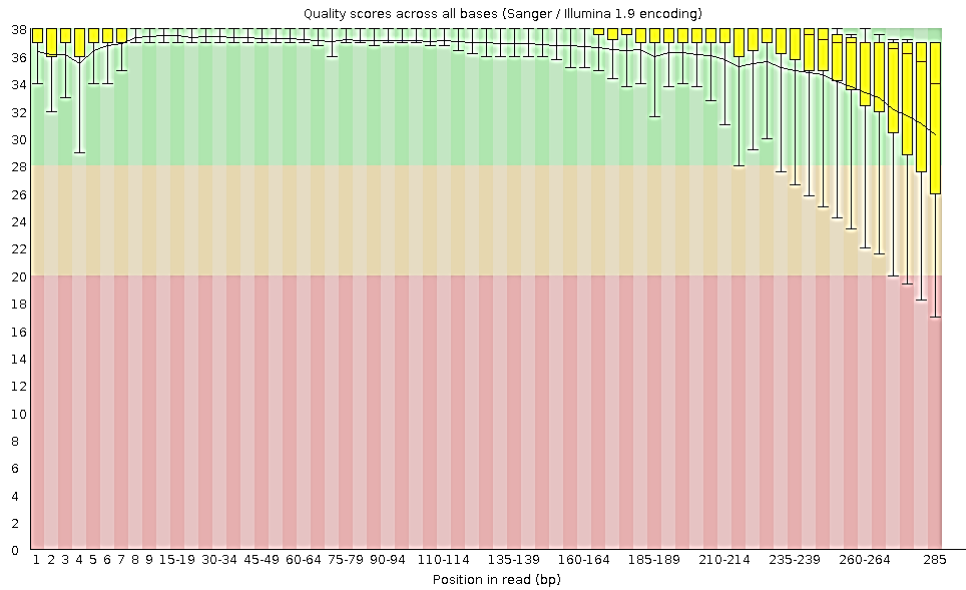

**Supplementary Figure 5:** FastQC Quality scores of paired Illumina reads of *S. cerevisiae* CENPK2-1C gDNA after trimming using Trimmomatic.

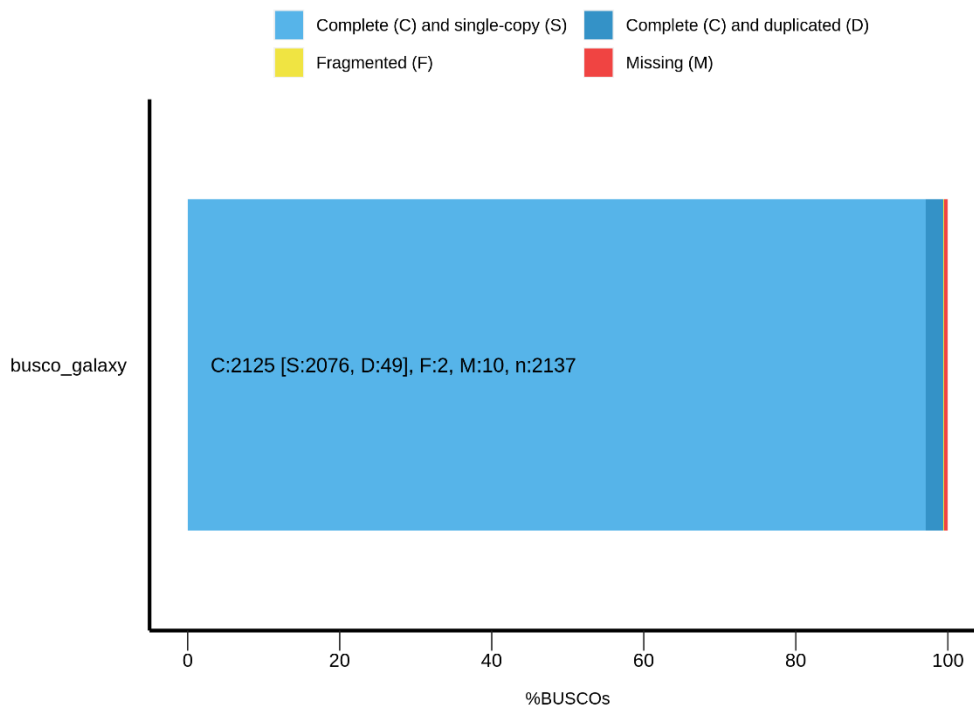

**Supplementary Figure 6:** BUSCO Assessment Results after assembling *S. cerevisiae* CENPK2-1C genome on a total of 28 contigs with an N50 of 800.5 Kbp and a genome size of 11.98 Mbp. Augustus was used as the gene predictor. This BUSCO gave a completeness score of 99.4% and found 2125 complete BUSCOs, 2076 complete and single-copy BUSCOs, 49 complete and duplicated BUSCOs, 2 fragmented BUSCOs, 10 missing BUSCOs, and searched a total of 2137 BUSCOs. Assembly statistics were; 28 scaffolds, 83 contigs, length of 11,994,286, 0.005% gaps, 800KB scaffold N50, and 309 contig N50.

Supplementary Table 2: Short summary of cDNA libraries used in transcriptomics

| Group                     | Barcode | Number of Reads | Included in DESeq2 |
|---------------------------|---------|-----------------|--------------------|
| Positive control          | BC01    | 92371           | Included           |
| Positive control          | BC02    | 633012          | Included           |
| Positive control          | BC03    | 2379021         | Included           |
| 0.5 mM CBD fed            | BC04    | 104495          | Included           |
| 0.5 mM CBD fed            | BC05    | 1496390         | Included           |
| 0.5 mM CBD fed            | BC06    | 8920            | Excluded           |
| Logarithmic phase control | None    | 3104404         | Included           |

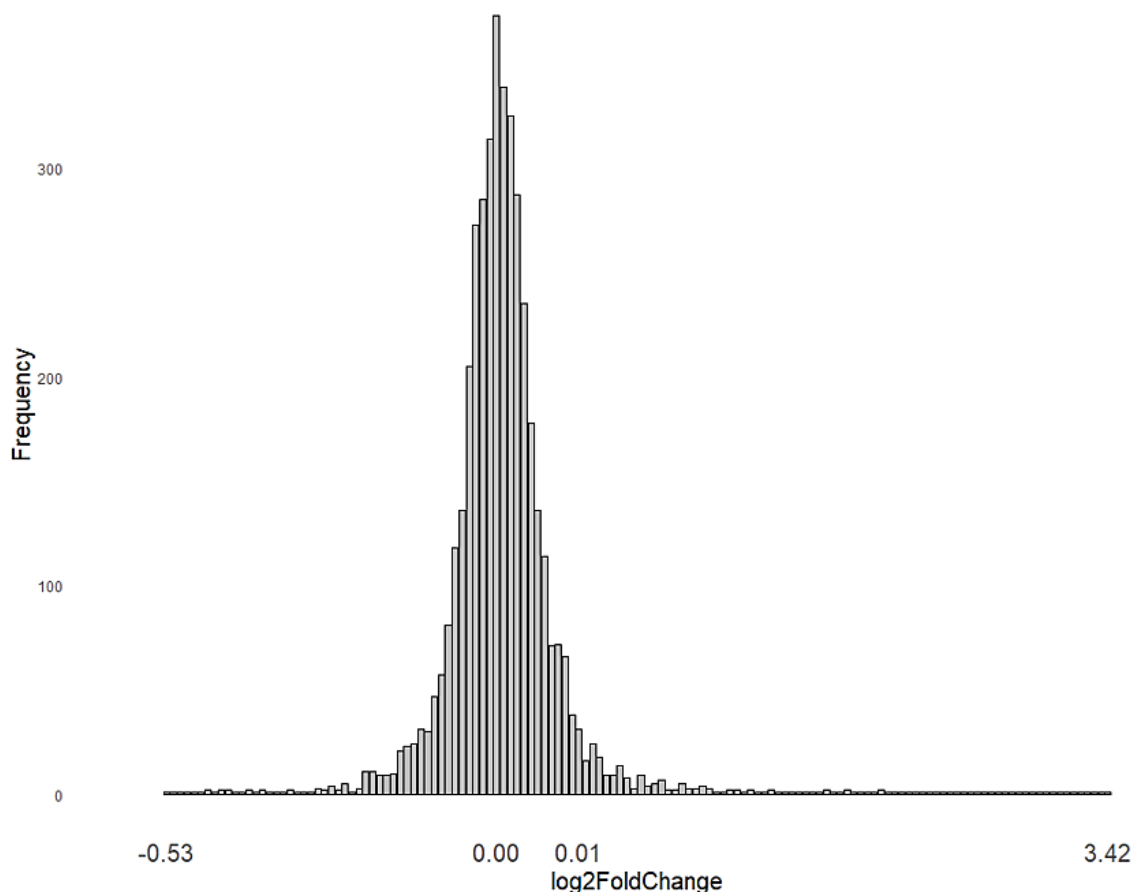

Supplementary Figure 7: Binned Histogram of DESeq2-produced log2 fold change values between CBD-fed, MeOH-fed, and mid-logarithmic phase *S. cerevisiae* CENPK2-1C cDNA libraries sequenced with Oxford Nanopore MK1C using SQK-PCB109 and a R9.1.4 flow cell. The mean of the data was 0.006. The x-axis was binned to show the distribution of the data, where a continuous x-axis would have shown virtually all data at the 0.0 point without any clarity about the shape of the data. The lowest value was -0.53 and the highest was 3.42.

**Supplementary Table 3: Nanoplot statistics from barcoded cDNA from *S. cerevisiae* CENPK2-1C RNA sequenced using SQK-PCB109 kit and R9.1.4 flow cell on an Oxford Nanopore MinION MK1C. Basecalling was performed in Guppy using super accurate basecalling.**

| Metrics                        | MeOH treated positive control |                               |                                | CBD fed experimental group   |                                |                           | Mid-log phase control<br>No barcode |
|--------------------------------|-------------------------------|-------------------------------|--------------------------------|------------------------------|--------------------------------|---------------------------|-------------------------------------|
|                                | BC01                          | BC02                          | BC03                           | BC04                         | BC05                           | BC06                      |                                     |
| number_of_reads                | 92371                         | 633012                        | 2379021                        | 104495                       | 1496390                        | 8920                      | 3104404                             |
| number_of_bases                | 66284106                      | 360685047                     | 843216336                      | 69189946                     | 900399094                      | 7145919                   | 1270185489                          |
| median_read_length             | 569                           | 398                           | 294                            | 562                          | 508                            | 639.5                     | 305                                 |
| mean_read_length               | 717.6                         | 569.8                         | 354.4                          | 662.1                        | 601.7                          | 801.1                     | 409.2                               |
| read_length_stdev              | 536.9                         | 457.7                         | 191                            | 438.4                        | 391.3                          | 565.5                     | 299.4                               |
| n50                            | 919                           | 712                           | 351                            | 756                          | 718                            | 1024                      | 435                                 |
| mean_qual                      | 12.7                          | 12.4                          | 11.9                           | 12.6                         | 12.5                           | 12.7                      | 12                                  |
| median_qual                    | 12.5                          | 12.2                          | 11.7                           | 12.5                         | 12.3                           | 12.6                      | 11.8                                |
| longest_read_(with_Q):1        | 11382<br>(14.5)               | 9599 (13.8)                   | 16872<br>(11.0)                | 5413<br>(11.4)               | 10675 (16.1)                   | 5718<br>(11.2)            | 16872 (11.0)                        |
| longest_read_(with_Q):2        | 6067<br>(14.1)                | 6026 (15.5)                   | 5740 (10.3)                    | 4574<br>(15.1)               | 5358 (12.6)                    | 5220<br>(16.4)            | 11382 (14.5)                        |
| longest_read_(with_Q):3        | 5639<br>(15.9)                | 5673 (11.5)                   | 4847 (12.8)                    | 4280<br>(14.0)               | 5156 (16.0)                    | 5217<br>(15.7)            | 9599 (13.8)                         |
| longest_read_(with_Q):4        | 5590<br>(12.7)                | 5665 (10.7)                   | 4461 (14.6)                    | 4252<br>(11.2)               | 5045 (10.2)                    | 4898<br>(16.3)            | 6067 (14.1)                         |
| longest_read_(with_Q):5        | 5534<br>(13.8)                | 5642 (11.3)                   | 4261 (11.9)                    | 4126<br>(12.5)               | 5044 (13.3)                    | 4780<br>(13.5)            | 6026 (15.5)                         |
| highest_Q_read_(with_length):1 | 19.7<br>(475)                 | 25.1 (203)                    | 22.4 (210)                     | 20.6<br>(2119)               | 23.0 (391)                     | 18.8<br>(1806)            | 25.1 (203)                          |
| highest_Q_read_(with_length):2 | 19.5<br>(3152)                | 21.7 (227)                    | 22.3 (174)                     | 20.1<br>(341)                | 22.9 (215)                     | 18.1<br>(1983)            | 22.4 (210)                          |
| highest_Q_read_(with_length):3 | 19.4<br>(3076)                | 21.5 (620)                    | 22.0 (155)                     | 19.6<br>(1435)               | 22.8 (394)                     | 18.1<br>(1609)            | 22.3 (174)                          |
| highest_Q_read_(with_length):4 | 18.9<br>(1370)                | 21.4 (369)                    | 21.6 (226)                     | 19.3<br>(589)                | 22.5 (223)                     | 18.1<br>(2174)            | 22.0 (155)                          |
| highest_Q_read_(with_length):5 | 18.9<br>(1530)                | 21.1 (232)                    | 21.6 (245)                     | 19.3<br>(1667)               | 22.4 (235)                     | 17.9<br>(1653)            | 21.7 (227)                          |
| Reads >Q5:                     | 92371<br>(100.0%)<br>66.3Mb   | 633012<br>(100.0%)<br>360.7Mb | 2379021<br>(100.0%)<br>843.2Mb | 104495<br>(100.0%)<br>69.2Mb | 1496390<br>(100.0%)<br>900.4Mb | 8920<br>(100.0%)<br>7.1Mb | 3104404<br>(100.0%)<br>1270.2Mb     |
| Reads >Q7:                     | 92371<br>(100.0%)<br>66.3Mb   | 633012<br>(100.0%)<br>360.7Mb | 2379021<br>(100.0%)<br>843.2Mb | 104495<br>(100.0%)<br>69.2Mb | 1496390<br>(100.0%)<br>900.4Mb | 8920<br>(100.0%)<br>7.1Mb | 3104404<br>(100.0%)<br>1270.2Mb     |
| Reads >Q10:                    | 92370<br>(100.0%)<br>66.3Mb   | 632999<br>(100.0%)<br>360.7Mb | 2379006<br>(100.0%)<br>843.2Mb | 104487<br>(100.0%)<br>69.2Mb | 1496338<br>(100.0%)<br>900.3Mb | 8919<br>(100.0%)<br>7.1Mb | 3104375<br>(100.0%)<br>1270.2Mb     |
| Reads >Q12:                    | 56777<br>(61.5%)<br>48.0Mb    | 340963<br>(53.9%)<br>243.2Mb  | 973028<br>(40.9%)<br>409.7Mb   | 63479<br>(60.7%)<br>49.0Mb   | 864528<br>(57.8%)<br>616.1Mb   | 5547<br>(62.2%)<br>5.2Mb  | 1370768<br>(44.2%)<br>701.0Mb       |
| Reads >Q15:                    | 8389<br>(9.1%)<br>11.0Mb      | 40703<br>(6.4%)<br>49.5Mb     | 30510<br>(1.3%)<br>21.6Mb      | 8157<br>(7.8%)<br>9.6Mb      | 96675<br>(6.5%)<br>103.0Mb     | 779<br>(8.7%)<br>1.1Mb    | 79602 (2.6%)<br>82.1Mb              |



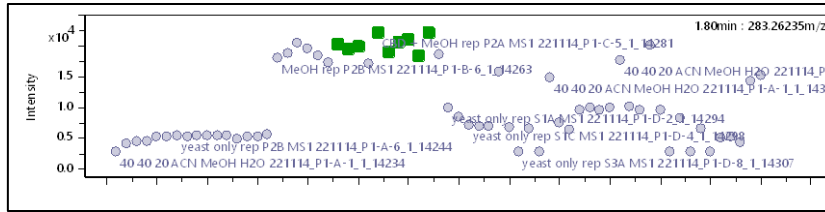

Supplementary Figure 10: Intensity plot of RT 1.80min 283.26235 m/z (Stearic acid)

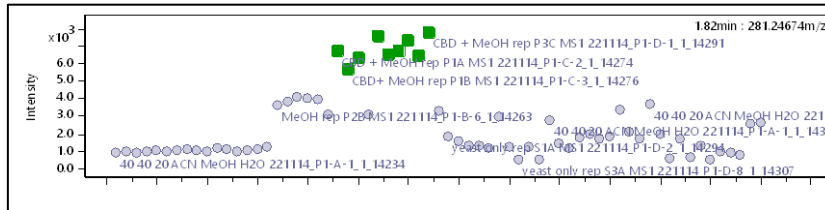

Supplementary Figure 11: Intensity plot of RT 1.82min 281.24674 m/z (2-Hydroxystearic acid)

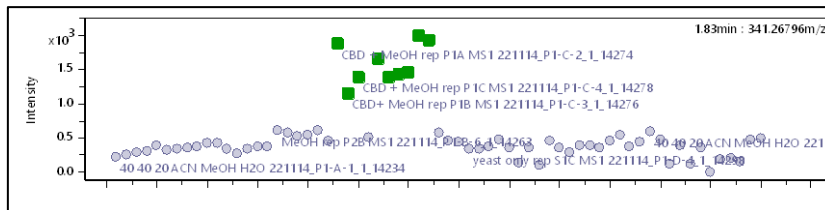

Supplementary Figure 12: Intensity plot of RT 1.83min 341.26796 m/z (Cannabidiol-o-methyl-o-methyl, artifact)

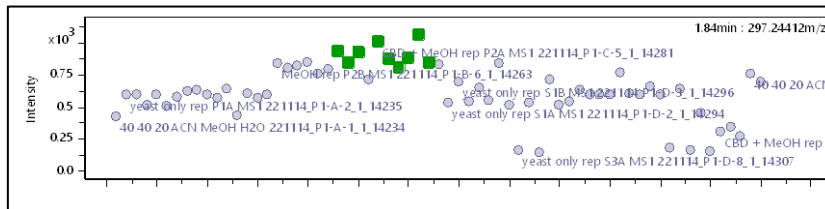

Supplementary Figure 13: Intensity plot of RT 1.84min 297.24412 m/z (9-Hydroxy-12-octadecenoic acid)

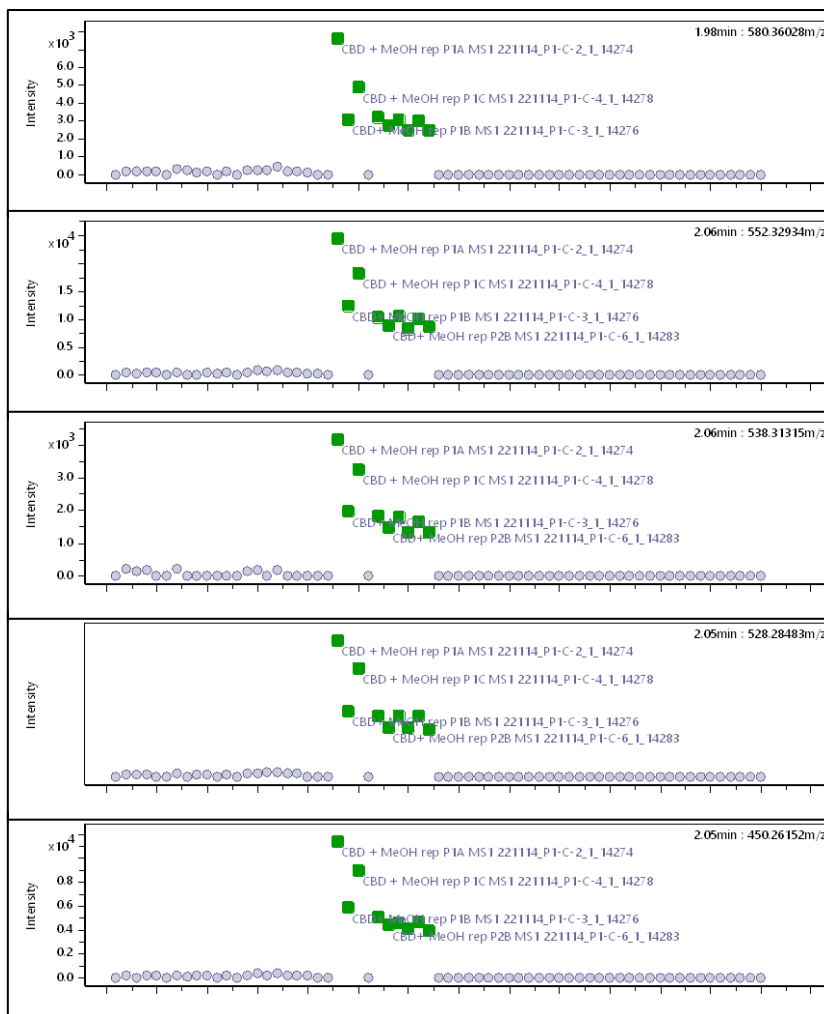

Supplementary Figure 14: Intensity plot of RT 1.98-2.05min 580.36028 m/z [M-], 552.32934 m/z [F1], 538.31315 m/z [F2], 528.28483 m/z [F3], 450.23152 m/z [F4] (1-docosanyl-glycero-3-phosphoserine)

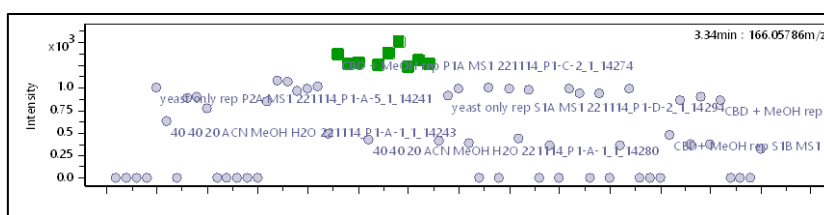

Supplementary Figure 15: Intensity plot of RT 3.34min 166.05786 m/z (not yet identified)

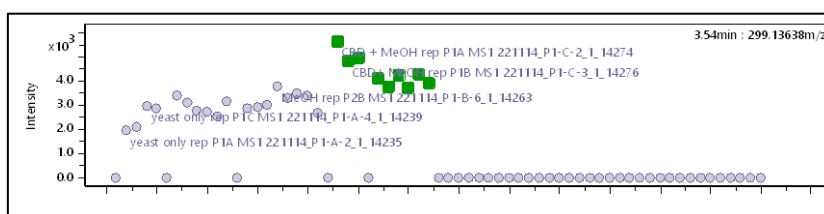

Supplementary Figure 16: Intensity plot of RT 3.54min 299.13638 m/z (not yet identified)

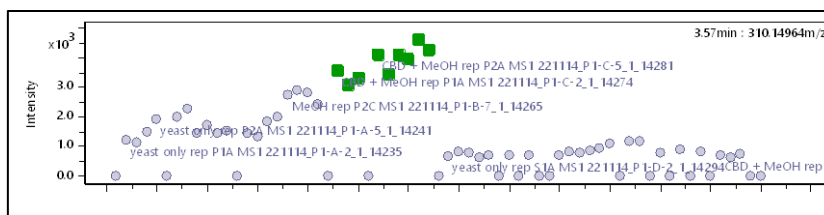

Supplementary Figure 17: Intensity plot of RT 3.57min 310.14964 m/z (not yet identified)

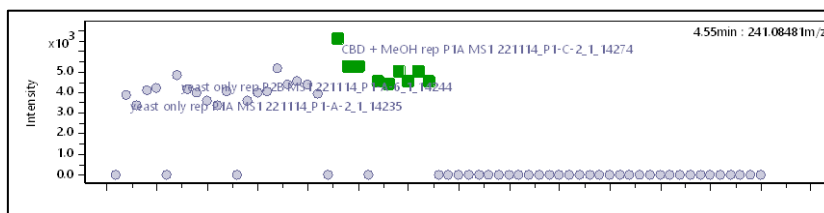

Supplementary Figure 18: Intensity plot of RT 4.55min 241.08487 m/z (Thymidine)

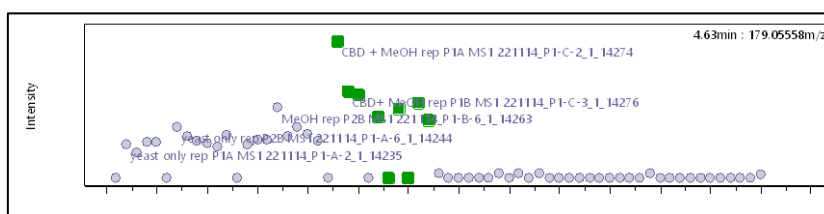

Supplementary Figure 19: Intensity plot of RT 4.63min 179.05558 m/z (D-glucose)

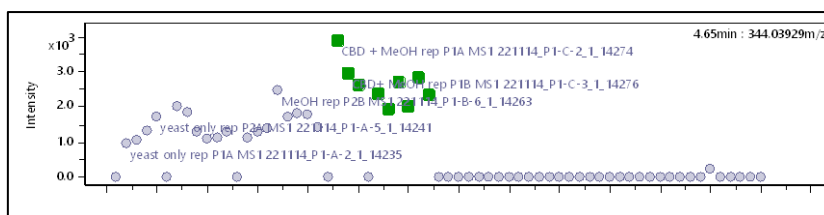

Supplementary Figure 20: Intensity plot of RT 4.65min 344.03929 m/z (Nucleotide monophosphate e.g. adenosine 2'-phosphate2- or AMP or dGMP)

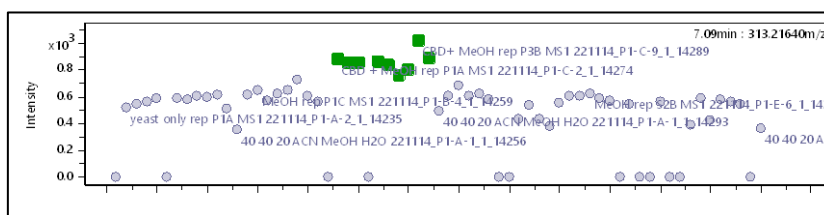

Supplementary Figure 21: Intensity plot of RT 7.09min 313.21640 m/z (Cannabidiol in tandem with another compound)

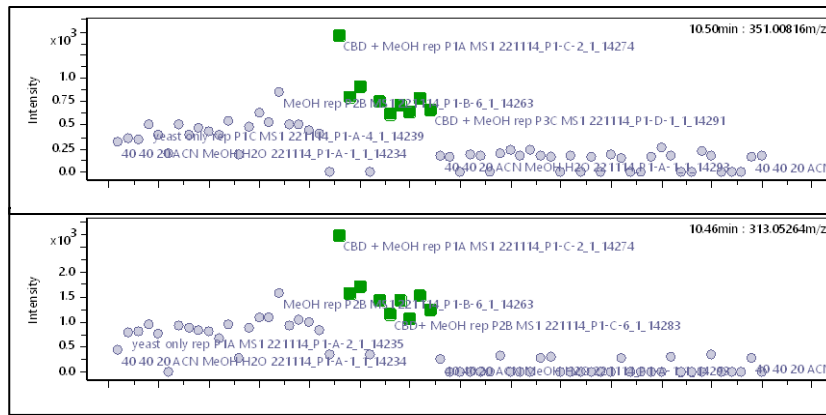

Supplementary Figure 22: Intensity plot of RT 10.46-10.50min 351.00819 m/z [M-], 313.05264 m/z [F1] (not yet identified)

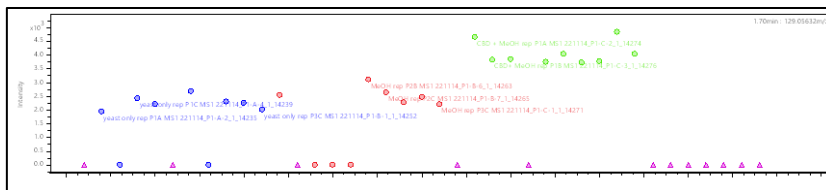

Supplementary Figure 23: Intensity plot of RT 1.70min 129.05632 m/z [M-] (not yet identified). Purple triangle = solvent blank, blue circle = negative control cell pellet, red circle = positive control cell pellet, green circle = CBD-fed cell pellet

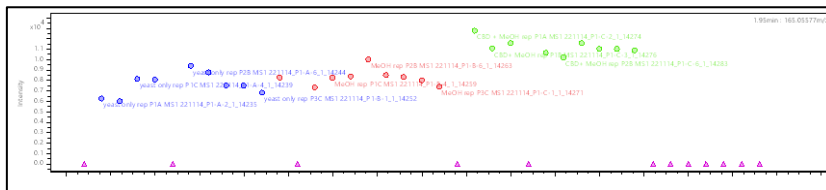

Supplementary Figure 24: Intensity plot of RT 1.95min 165.05577 m/z [M-] (not yet identified). Purple triangle = solvent blank, blue circle = negative control cell pellet, red circle = positive control cell pellet, green circle = CBD-fed cell pellet

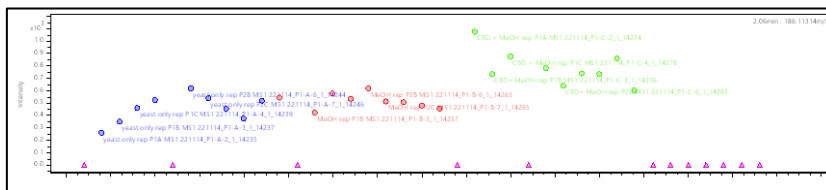

Supplementary Figure 25: Intensity plot of RT 2.06min 186.11314 m/z [M-] (8-Amino-7-oxononanoate). Purple triangle = solvent blank, blue circle = negative control cell pellet, red circle = positive control cell pellet, green circle = CBD-fed cell pellet

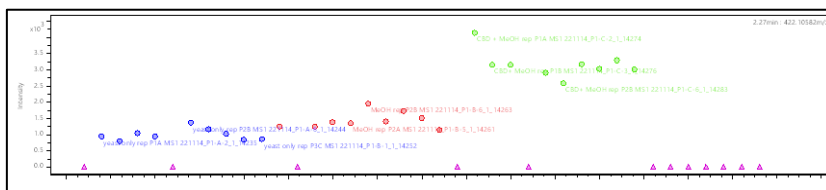

Supplementary Figure 26: Intensity plot of RT 2.27min 422.10582 m/z [M-] (not yet identified). Purple triangle = solvent blank, blue circle = negative control cell pellet, red circle = positive control cell pellet, green circle = CBD-fed cell pellet

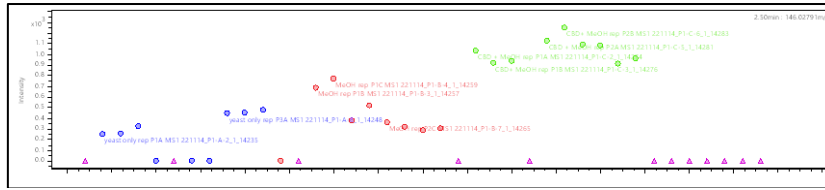

**Supplementary Figure 27:** Intensity plot of RT 2.50min 146.02791 m/z [M<sup>-</sup>] (Thiomorpholine 3-carboxylate). Purple triangle = solvent blank, blue circle = negative control cell pellet, red circle = positive control cell pellet, green circle = CBD-fed cell pellet

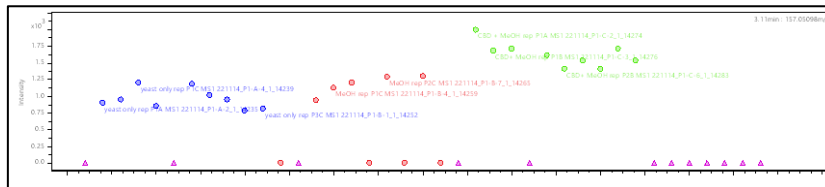

**Supplementary Figure 28:** Intensity plot of RT 3.11min 157.05098 m/z [M<sup>-</sup>] (not yet identified). Purple triangle = solvent blank, blue circle = negative control cell pellet, red circle = positive control cell pellet, green circle = CBD-fed cell pellet

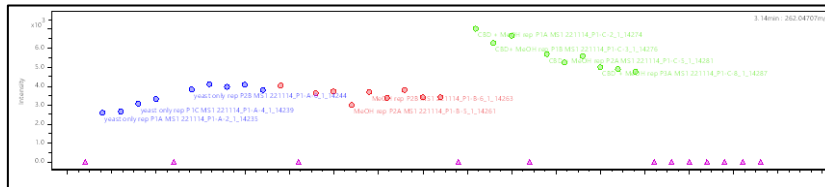

**Supplementary Figure 29:** Intensity plot of RT 3.14min 262.40707 m/z [M<sup>-</sup>] (not yet identified). Purple triangle = solvent blank, blue circle = negative control cell pellet, red circle = positive control cell pellet, green circle = CBD-fed cell pellet

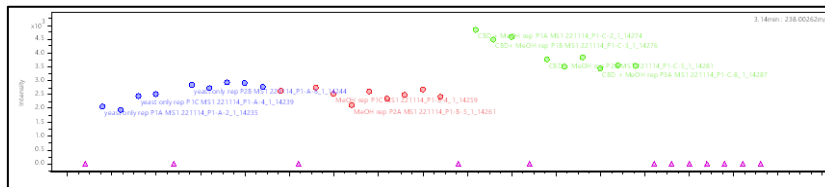

**Supplementary Figure 29:** Intensity plot of RT 3.14min 238.00262 m/z [M<sup>-</sup>] (not yet identified). Purple triangle = solvent blank, blue circle = negative control cell pellet, red circle = positive control cell pellet, green circle = CBD-fed cell pellet

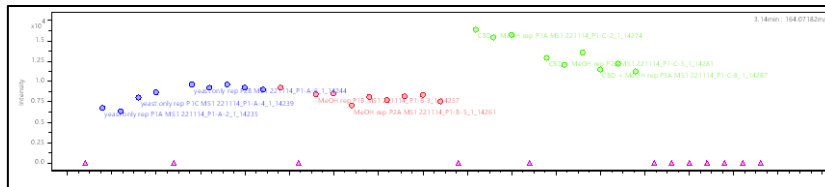

**Supplementary Figure 30:** Intensity plot of RT 3.14min 164.07182 m/z [M<sup>-</sup>] (L-Phenylalanine). Purple triangle = solvent blank, blue circle = negative control cell pellet, red circle = positive control cell pellet, green circle = CBD-fed cell pellet

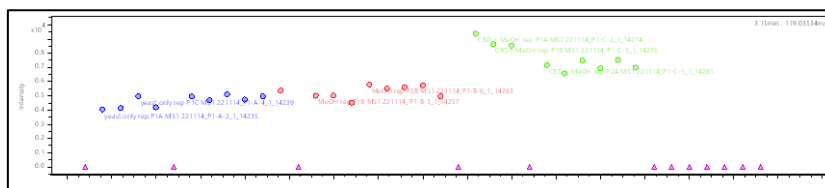

**Supplementary Figure 31:** Intensity plot of RT 3.15min 119.03534 m/z [M<sup>-</sup>] (D-Erythrose). Purple triangle = solvent blank, blue circle = negative control cell pellet, red circle = positive control cell pellet, green circle = CBD-fed cell pellet

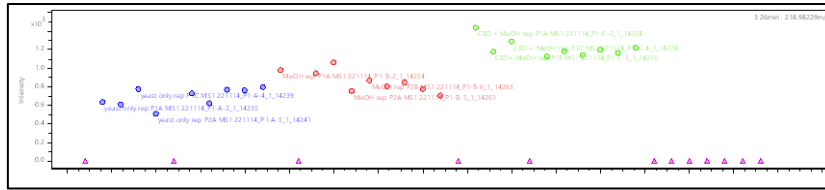

**Supplementary Figure 32:** Intensity plot of RT 3.26min 218.98229 m/z [M-] (not yet identified). Purple triangle = solvent blank, blue circle = negative control cell pellet, red circle = positive control cell pellet, green circle = CBD-fed cell pellet

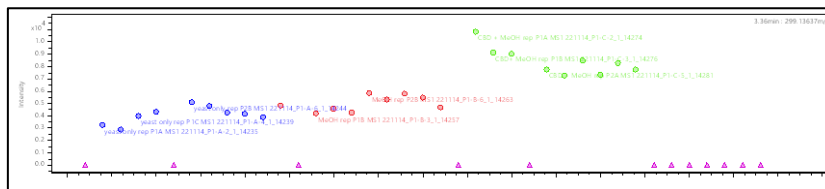

**Supplementary Figure 33:** Intensity plot of RT 3.36min 299.13637 m/z [M-] (not yet identified). Purple triangle = solvent blank, blue circle = negative control cell pellet, red circle = positive control cell pellet, green circle = CBD-fed cell pellet

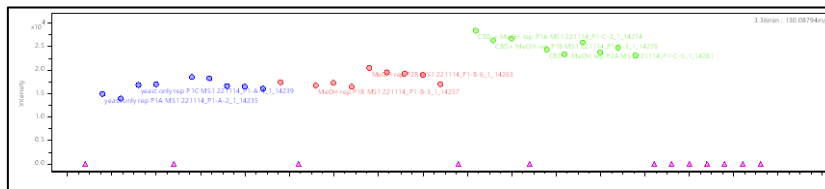

**Supplementary Figure 34:** Intensity plot of RT 3.36min 130.08794 m/z [M-] (L-Leucine). Purple triangle = solvent blank, blue circle = negative control cell pellet, red circle = positive control cell pellet, green circle = CBD-fed cell pellet

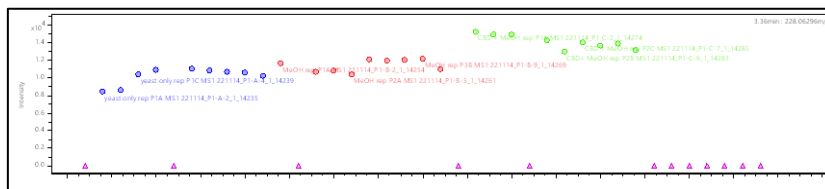

**Supplementary Figure 35:** Intensity plot of RT 3.36min 228.06296 m/z [M-] (not yet identified). Purple triangle = solvent blank, blue circle = negative control cell pellet, red circle = positive control cell pellet, green circle = CBD-fed cell pellet

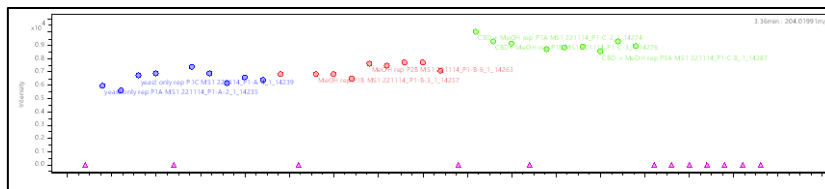

**Supplementary Figure 36:** Intensity plot of RT 3.36min 204.01991 m/z [M-] (not yet identified). Purple triangle = solvent blank, blue circle = negative control cell pellet, red circle = positive control cell pellet, green circle = CBD-fed cell pellet

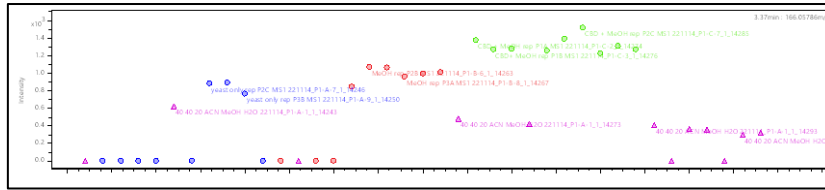

**Supplementary Figure 37:** Intensity plot of RT 3.37min 166.05786 m/z [M-] (not yet identified). Purple triangle = solvent blank, blue circle = negative control cell pellet, red circle = positive control cell pellet, green circle = CBD-fed cell pellet

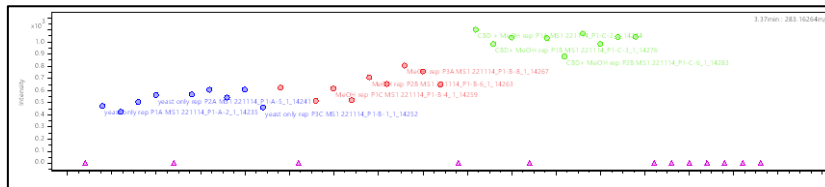

**Supplementary Figure 38:** Intensity plot of RT 3.37min 283.16264 m/z [M-] (not yet identified). Purple triangle = solvent blank, blue circle = negative control cell pellet, red circle = positive control cell pellet, green circle = CBD-fed cell pellet

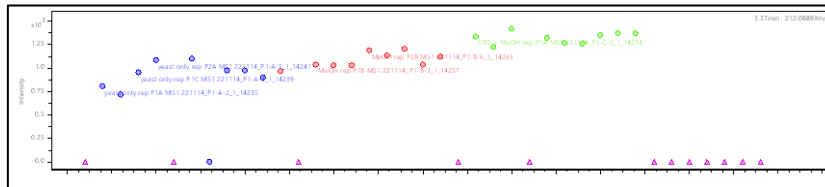

**Supplementary Figure 39:** Intensity plot of RT 3.37min 212.08893 m/z [M-] (not yet identified). Purple triangle = solvent blank, blue circle = negative control cell pellet, red circle = positive control cell pellet, green circle = CBD-fed cell pellet

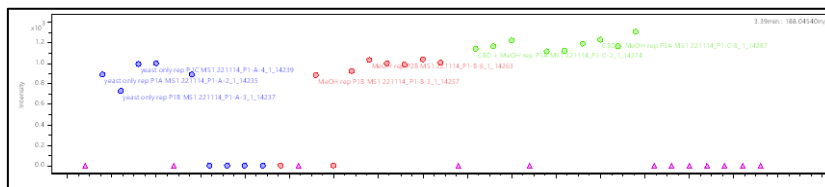

**Supplementary Figure 40:** Intensity plot of RT 3.39min 188.04540 m/z [M-] (not yet identified). Purple triangle = solvent blank, blue circle = negative control cell pellet, red circle = positive control cell pellet, green circle = CBD-fed cell pellet

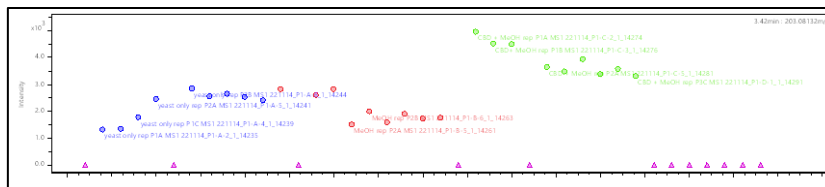

**Supplementary Figure 41:** Intensity plot of RT 3.42min 203.08132 m/z [M-] (L-Tryptophan). Purple triangle = solvent blank, blue circle = negative control cell pellet, red circle = positive control cell pellet, green circle = CBD-fed cell pellet

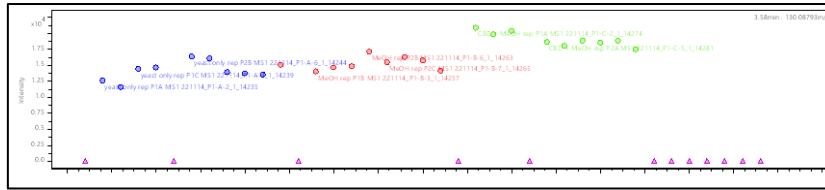

**Supplementary Figure 42:** Intensity plot of RT 3.58min 130.08793 m/z [M-] (L-Isoleucine). Purple triangle = solvent blank, blue circle = negative control cell pellet, red circle = positive control cell pellet, green circle = CBD-fed cell pellet

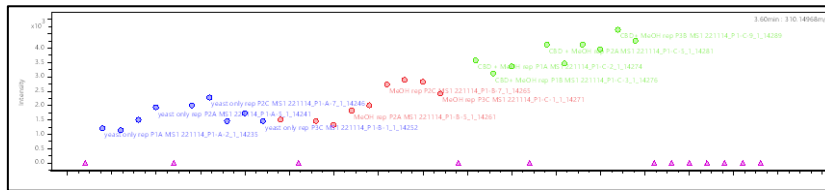

**Supplementary Figure 43:** Intensity plot of RT 3.60min 310.14968 m/z [M-] (not yet identified). Purple triangle = solvent blank, blue circle = negative control cell pellet, red circle = positive control cell pellet, green circle = CBD-fed cell pellet

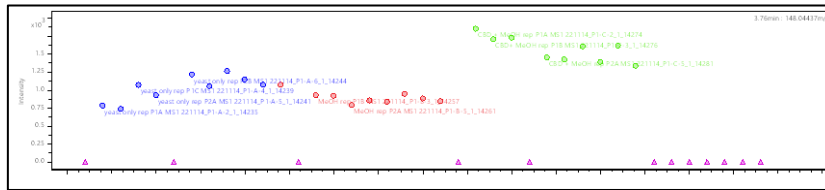

**Supplementary Figure 44:** Intensity plot of RT 3.76min 148.04437 m/z [M-] (L-Methionine). Purple triangle = solvent blank, blue circle = negative control cell pellet, red circle = positive control cell pellet, green circle = CBD-fed cell pellet

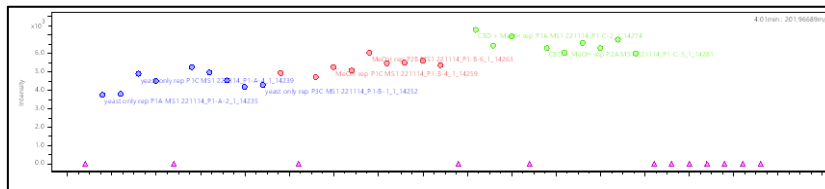

**Supplementary Figure 45:** Intensity plot of RT 4.01min 201.96689 m/z [M-] (not yet identified). Purple triangle = solvent blank, blue circle = negative control cell pellet, red circle = positive control cell pellet, green circle = CBD-fed cell pellet

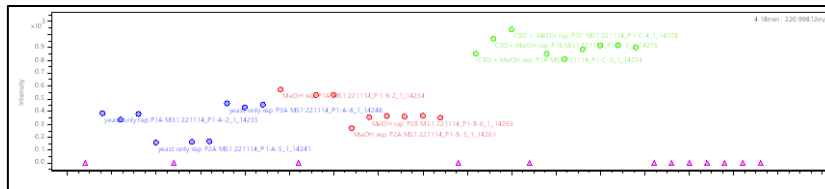

**Supplementary Figure 46:** Intensity plot of RT 4.18min 220.99812 m/z [M-2] (not yet identified). Purple triangle = solvent blank, blue circle = negative control cell pellet, red circle = positive control cell pellet, green circle = CBD-fed cell pellet

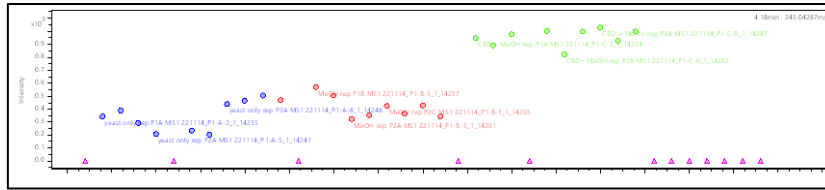

**Supplementary Figure 47:** Intensity plot of RT 4.18min 245.04287 m/z [M-] (glycerophosphoglycerol). Purple triangle = solvent blank, blue circle = negative control cell pellet, red circle = positive control cell pellet, green circle = CBD-fed cell pellet

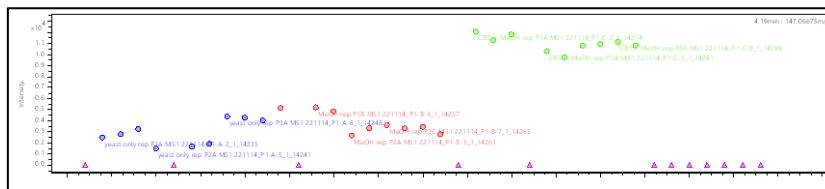

**Supplementary Figure 48:** Intensity plot of RT 4.19min 147.06675 m/z [M-] (not yet identified). Purple triangle = solvent blank, blue circle = negative control cell pellet, red circle = positive control cell pellet, green circle = CBD-fed cell pellet

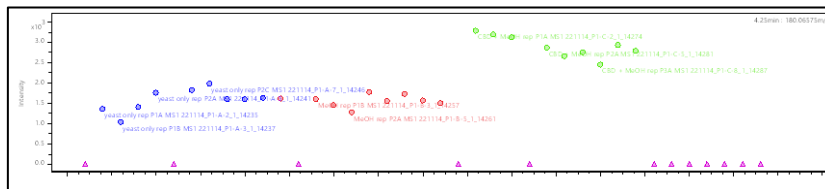

**Supplementary Figure 49:** Intensity plot of RT 4.25min 180.06575 m/z [M-] (L-Tyrosine). Purple triangle = solvent blank, blue circle = negative control cell pellet, red circle = positive control cell pellet, green circle = CBD-fed cell pellet

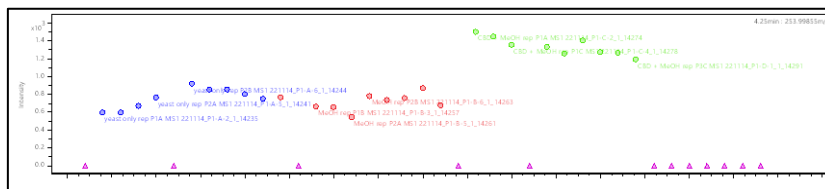

**Supplementary Figure 50:** Intensity plot of RT 4.25min 253.99855 m/z [M-] (not yet identified). Purple triangle = solvent blank, blue circle = negative control cell pellet, red circle = positive control cell pellet, green circle = CBD-fed cell pellet

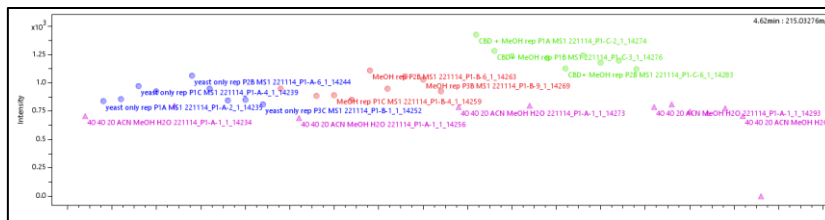

**Supplementary Figure 51:** Intensity plot of RT 4.62min 215.03276 m/z [M-] (not yet identified). Purple triangle = solvent blank, blue circle = negative control cell pellet, red circle = positive control cell pellet, green circle = CBD-fed cell pellet

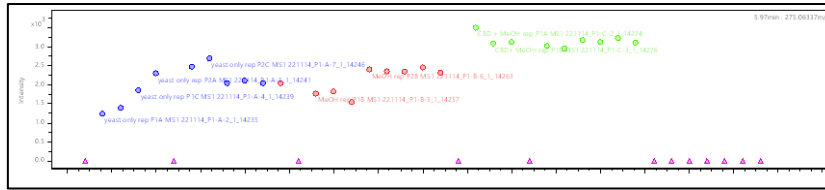

**Supplementary Figure 52:** Intensity plot of RT 5.97min 275.06337 m/z [M-] (not yet identified). Purple triangle = solvent blank, blue circle = negative control cell pellet, red circle = positive control cell pellet, green circle = CBD-fed cell pellet

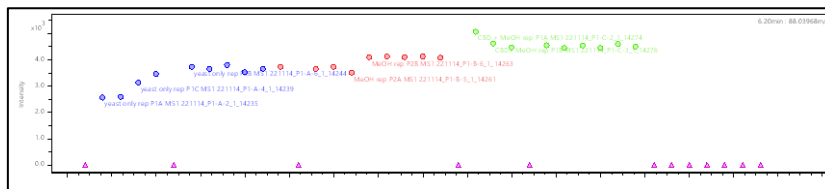

**Supplementary Figure 53:** Intensity plot of RT 6.20min 88.03968 m/z [M-] (L-Alanine). Purple triangle = solvent blank, blue circle = negative control cell pellet, red circle = positive control cell pellet, green circle = CBD-fed cell pellet

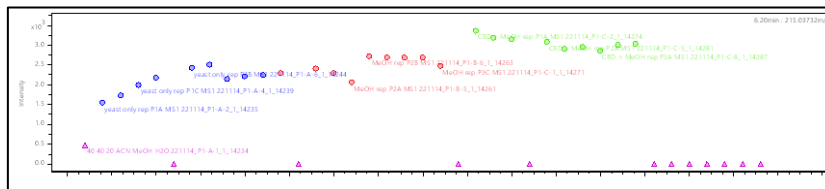

**Supplementary Figure 54:** Intensity plot of RT 6.20min 215.03732 m/z [M-] (not yet identified). Purple triangle = solvent blank, blue circle = negative control cell pellet, red circle = positive control cell pellet, green circle = CBD-fed cell pellet

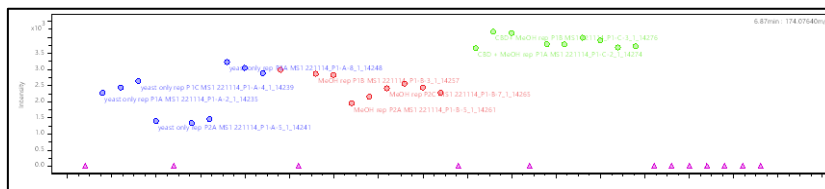

**Supplementary Figure 55:** Intensity plot of RT 6.87min 174.07640 m/z [M-] (not yet identified). Purple triangle = solvent blank, blue circle = negative control cell pellet, red circle = positive control cell pellet, green circle = CBD-fed cell pellet

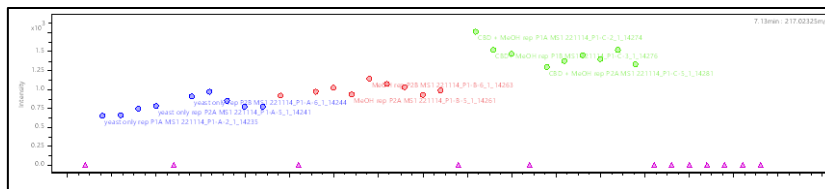

**Supplementary Figure 56:** Intensity plot of RT 7.13min 217.02325 m/z [M-] (not yet identified). Purple triangle = solvent blank, blue circle = negative control cell pellet, red circle = positive control cell pellet, green circle = CBD-fed cell pellet

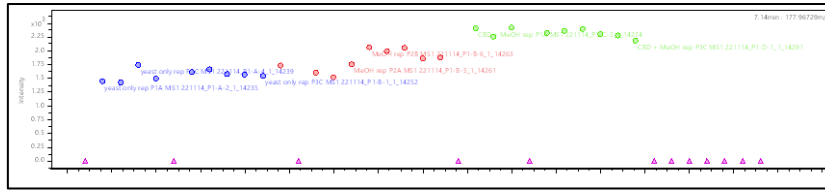

**Supplementary Figure 57:** Intensity plot of RT 7.14min 177.96729 m/z [M-] (not yet identified). Purple triangle = solvent blank, blue circle = negative control cell pellet, red circle = positive control cell pellet, green circle = CBD-fed cell pellet

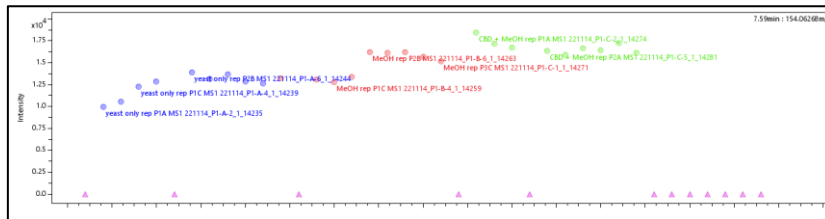

**Supplementary Figure 58:** Intensity plot of RT 7.59min 154.06268 m/z [M-] (L-Histidine). Purple triangle = solvent blank, blue circle = negative control cell pellet, red circle = positive control cell pellet, green circle = CBD-fed cell pellet

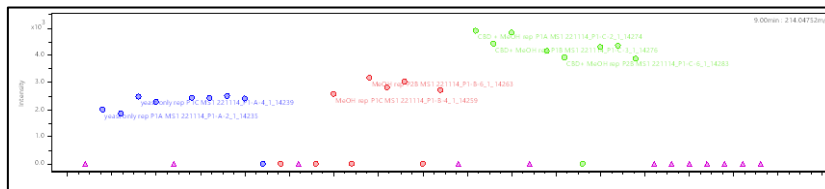

**Supplementary Figure 59:** Intensity plot of RT 9.00min 214.04752 m/z [M-] (sn-Glycero-3-phosphoethanolamine). Purple triangle = solvent blank, blue circle = negative control cell pellet, red circle = positive control cell pellet, green circle = CBD-fed cell pellet

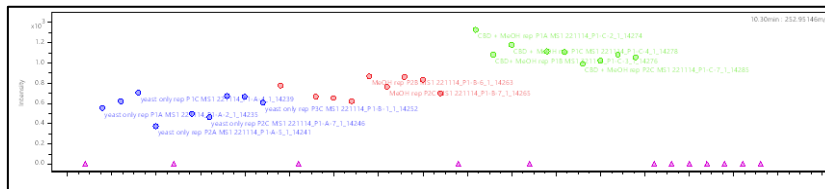

**Supplementary Figure 60:** Intensity plot of RT 10.30min 252.95146 m/z [M-] (not yet identified). Purple triangle = solvent blank, blue circle = negative control cell pellet, red circle = positive control cell pellet, green circle = CBD-fed cell pellet

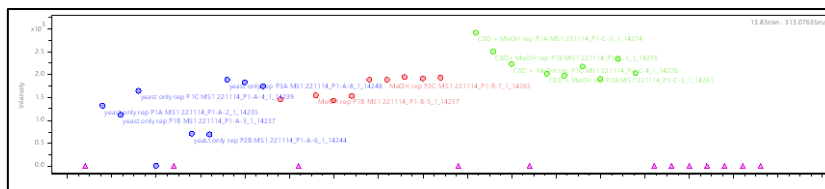

**Supplementary Figure 61:** Intensity plot of RT 13.83min 313.07635 m/z [M-] (not yet identified). Purple triangle = solvent blank, blue circle = negative control cell pellet, red circle = positive control cell pellet, green circle = CBD-fed cell pellet

**Supplementary Table 5: Metabolanalyst Pathway Analysis results, input list; Stearic acid, 2R-hydroxy-stearic acid, Thymidine, D-Glucose, 3'-AMP, 8-Amino-7-oxononanoate, Thiomorpholine 3-carboxylate, L-Phenylalanine, Erythrose, L-Leucine, L-Tryptophan, L-Isoleucine, L-Methionine, sn-glycero-3-phosphoethanolamine, L-Tyrosine, L-Alanine, L-Histidine**

|                                                     | Total | Expected | Hits | Raw p    | (-)LOG10(p) | Holm adjust | FDR      | Impact   |
|-----------------------------------------------------|-------|----------|------|----------|-------------|-------------|----------|----------|
| Aminoacyl-tRNA biosynthesis                         | 46    | 0.62585  | 8    | 1.25E-08 | 7.9018      | 9.15E-07    | 9.15E-07 | 0        |
| Phenylalanine, tyrosine and tryptophan biosynthesis | 21    | 0.28571  | 3    | 0.002234 | 2.651       | 0.16083     | 0.081533 | 0.02144  |
| Valine, leucine and isoleucine degradation          | 18    | 0.2449   | 2    | 0.023016 | 1.638       | 1           | 0.41101  | 0        |
| Ubiquinone and other terpenoid-quinone biosynthesis | 2     | 0.027211 | 1    | 0.027041 | 1.568       | 1           | 0.41101  | 0        |
| Valine, leucine and isoleucine biosynthesis         | 20    | 0.27211  | 2    | 0.028151 | 1.5505      | 1           | 0.41101  | 0        |
| Phenylalanine metabolism                            | 7     | 0.095238 | 1    | 0.091738 | 1.0375      | 1           | 1        | 0        |
| Biotin metabolism                                   | 13    | 0.17687  | 1    | 0.16416  | 0.78474     | 1           | 1        | 0        |
| Tyrosine metabolism                                 | 15    | 0.20408  | 1    | 0.1871   | 0.72793     | 1           | 1        | 0        |
| Histidine metabolism                                | 18    | 0.2449   | 1    | 0.22042  | 0.65674     | 1           | 1        | 0        |
| Alanine, aspartate and glutamate metabolism         | 22    | 0.29932  | 1    | 0.26291  | 0.58019     | 1           | 1        | 0        |
| Biosynthesis of unsaturated fatty acids             | 23    | 0.31293  | 1    | 0.2732   | 0.56352     | 1           | 1        | 0        |
| Glycolysis / Gluconeogenesis                        | 24    | 0.32653  | 1    | 0.28335  | 0.54768     | 1           | 1        | 4.00E-04 |
| Tryptophan metabolism                               | 30    | 0.40816  | 1    | 0.34159  | 0.4665      | 1           | 1        | 0.07752  |
| Glycine, serine and threonine metabolism            | 32    | 0.43537  | 1    | 0.36002  | 0.44368     | 1           | 1        | 0        |
| Glycerophospholipid metabolism                      | 32    | 0.43537  | 1    | 0.36002  | 0.44368     | 1           | 1        | 0.05824  |
| Cysteine and methionine metabolism                  | 41    | 0.55782  | 1    | 0.43723  | 0.35929     | 1           | 1        | 0.12222  |

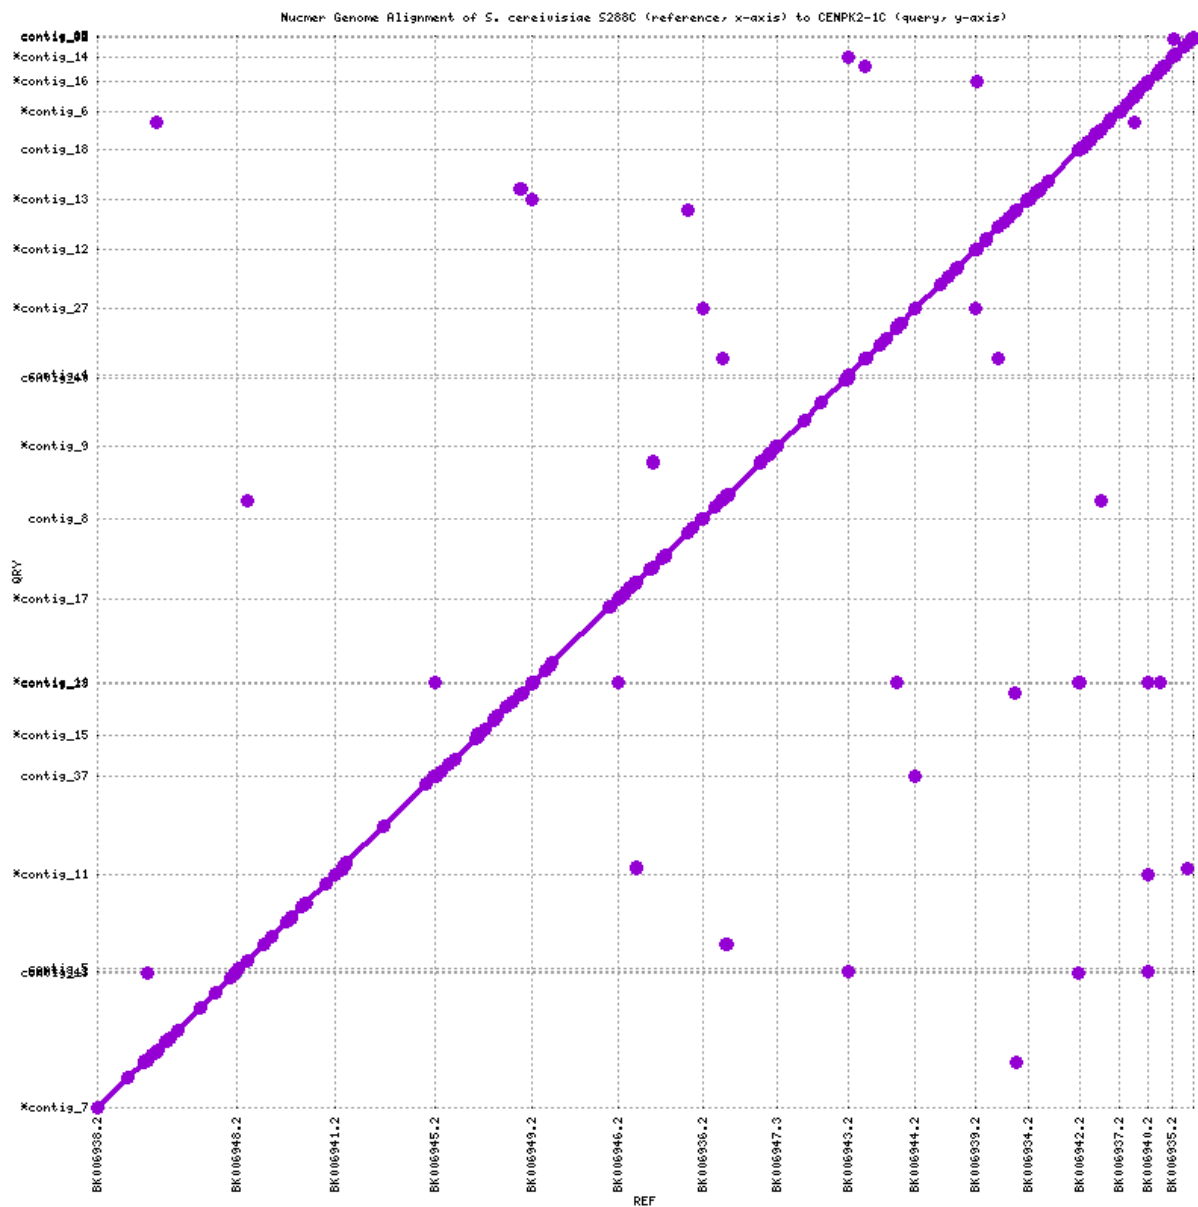

Supplementary Figure 62: Nucmer alignment of *S. cerevisiae* S288C (R64 reference) and *S. cerevisiae* CENPK2-1C. Minimum cluster length = 100, maximum gap distance = 500, filtering = yes, fat = yes. The alignment shows an overall high degree of identity with no major structural changes.

Supplementary Table 6: DNAdiff output of *S. cerevisiae* R64 S288C genome (reference) and *S. cerevisiae* CENPK2-1C (query).

|                     | [REF]              | [QRY]              |
|---------------------|--------------------|--------------------|
| [Sequences]         |                    |                    |
| TotalSeqs           | 28                 | 16                 |
| AlignedSeqs         | 21(75.0000%)       | 16(100.0000%)      |
| UnalignedSeqs       | 7(25.0000%)        | 0(0.0000%)         |
| [Bases]             |                    |                    |
| TotalBases          | 11994286           | 12071326           |
| AlignedBases        | 11886308(99.0998%) | 11960630(99.0830%) |
| UnalignedBases      | 107978(0.9002%)    | 110696(0.9170%)    |
| [Alignments]        |                    |                    |
| 1-to-1              | 174                | 174                |
| TotalLength         | 11817895           | 11818167           |
| AvgLength           | 67918.9368         | 67920.5            |
| AvgIdentity         | 99.7333            | 99.7333            |
| M-to-M              |                    |                    |
| TotalLength         | 12356756           | 12356522           |
| AvgLength           | 25013.6761         | 25013.2024         |
| AvgIdentity         | 99.6238            | 99.6238            |
| [Feature Estimates] |                    |                    |
| Breakpoints         | 947                | 970                |
| Relocations         | 11                 | 12                 |
| Translocations      | 17                 | 23                 |
| Inversions          | 0                  | 0                  |
| Insertions          |                    |                    |
| InsertionSum        | 322830             | 420454             |
| InsertionAvg        | 1422.1586          | 1378.5377          |
| TandemIns           |                    |                    |
| TandemInsSum        | 2898               | 477                |
| TandemInsAvg        | 263.4545           | 119.25             |
| [SNPs]              |                    |                    |
| TotalSNPs           | 23468              | 23468              |
| GT                  | 707(3.0126%)       | 699(2.9785%)       |
| GA                  | 4370(18.6211%)     | 4390(18.7063%)     |
| GC                  | 648(2.7612%)       | 652(2.7783%)       |
| TA                  | 1044(4.4486%)      | 966(4.1162%)       |
| TG                  | 699(2.9785%)       | 707(3.0126%)       |
| TC                  | 4384(18.6808%)     | 4222(17.9905%)     |
| CG                  | 652(2.7783%)       | 648(2.7612%)       |
| CT                  | 4222(17.9905%)     | 4384(18.6808%)     |
| CA                  | 702(2.9913%)       | 684(2.9146%)       |
| AT                  | 966(4.1162%)       | 1044(4.4486%)      |
| AC                  | 684(2.9146%)       | 702(2.9913%)       |
| AG                  | 4390(18.7063%)     | 4370(18.6211%)     |
| TotalGSNPs          |                    |                    |
| GT                  | 344(2.5423%)       | 354(2.6162%)       |
| GC                  | 333(2.4610%)       | 371(2.7419%)       |
| GA                  | 2588(19.1265%)     | 2635(19.4738%)     |
| TA                  | 547(4.0426%)       | 511(3.7765%)       |
| TG                  | 354(2.6162%)       | 344(2.5423%)       |
| TC                  | 2600(19.2151%)     | 2541(18.7791%)     |
| CG                  | 371(2.7419%)       | 333(2.4610%)       |
| CT                  | 2541(18.7791%)     | 2600(19.2151%)     |
| CA                  | 363(2.6827%)       | 344(2.5423%)       |
| AT                  | 511(3.7765%)       | 547(4.0426%)       |
| AC                  | 344(2.5423%)       | 363(2.6827%)       |
| AG                  | 2635(19.4738%)     | 2588(19.1265%)     |
| TotalIndels         |                    |                    |
| G.                  | 424(6.4991%)       | 469(7.1888%)       |
| T.                  | 1030(15.7879%)     | 1398(21.4286%)     |
| C.                  | 369(5.6560%)       | 473(7.2502%)       |
| A.                  | 989(15.1594%)      | 1281(19.6352%)     |
| N.                  | 91(1.3948%)        | 0(0.0000%)         |
| .T                  | 1398(21.4286%)     | 1030(15.7879%)     |
| .A                  | 1281(19.6352%)     | 989(15.1594%)      |
| .G                  | 469(7.1888%)       | 424(6.4991%)       |
| .C                  | 473(7.2502%)       | 369(5.6560%)       |
| .N                  | 0(0.0000%)         | 91(1.3948%)        |
| TotalGIndels        |                    |                    |
| G.                  | 27(3.4483%)        | 23(2.9374%)        |
| T.                  | 167(21.3282%)      | 177(22.6054%)      |
| C.                  | 29(3.7037%)        | 25(3.1928%)        |
| A.                  | 163(20.8174%)      | 172(21.9668%)      |
| .T                  | 177(22.6054%)      | 167(21.3282%)      |
| .C                  | 25(3.1928%)        | 29(3.7037%)        |
| .G                  | 23(2.9374%)        | 27(3.4483%)        |
| .A                  | 172(21.9668%)      | 163(20.8174%)      |

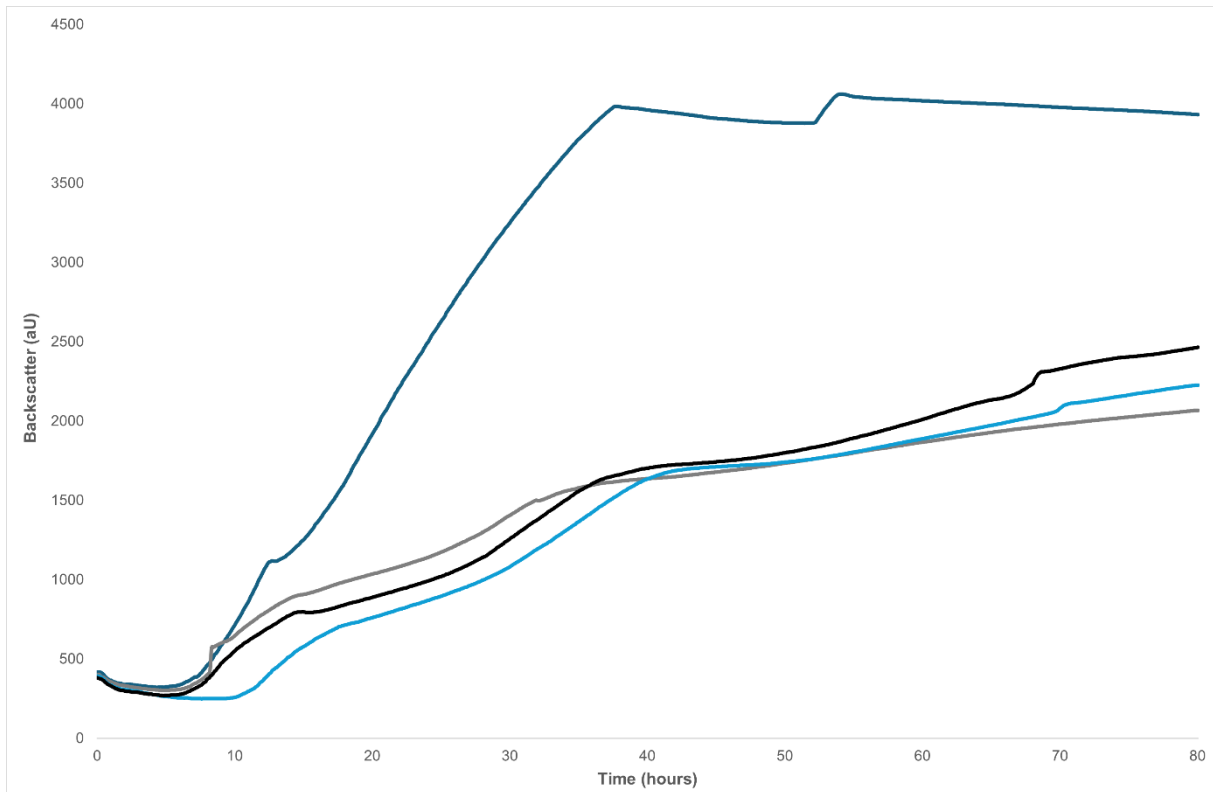

Supplementary Figure 63: Continual growth monitoring curves of Knockout-Rescue Assay, Wildtype (black),  $\Delta pdr5::KANM$  (gray),  $\Delta pdr5::PDR5-KANM$  (dark blue),  $\Delta cis1::URA3$  (light blue). The observed post-diauxic shift occurs in all strains except  $\Delta pdr5::KANM$ .

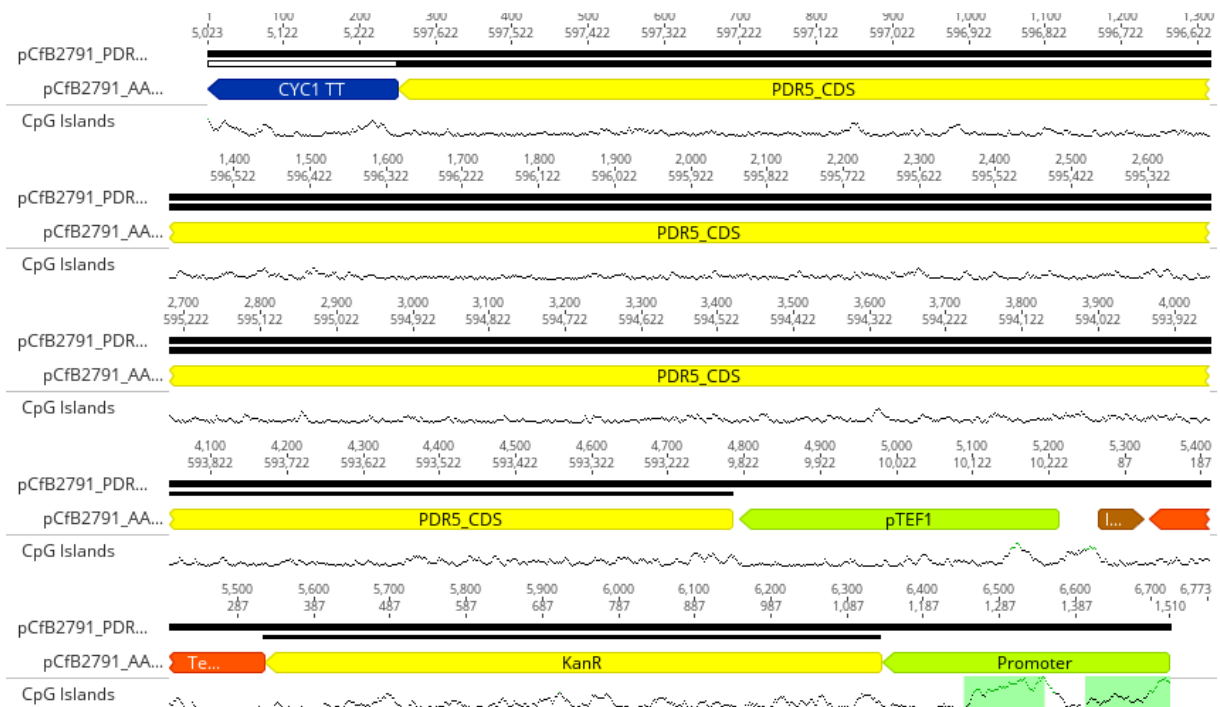

Supplementary Figure 64: Diagram of insertion cassette for Knockout-rescue assay,  $\Delta pdr5::KANM$  was produced with the sequence from basepairs 5,333 to 6,723.  $\Delta pdr5::PDR5-KANM$  was produced with the entire sequence.
